# Supplementary material for: Cyr61 from adipose‐derived stem cells promotes colorectal cancer metastasis and vasculogenic mimicry formation via integrin αVβ5
Source: PubMed Central journal article supplement (PMC8637569; doi:10.1002/1878-0261.12998), 2021-06-01
Supplement: MOL2-15-3447-s001.pdf [file MOL2-15-3447-s001.pdf]

1 **Title:** Cyr61 from adipose-derived stem cells promotes colorectal cancer  
2 metastasis and vasculogenic mimicry formation via integrin  $\alpha_v\beta_5$

3 **Authors:** Zhenxing Liang<sup>1, 2, 3</sup>, Huashan Liu<sup>1, 2, 3</sup>, Yunfeng Zhang<sup>1</sup>, Li Xiong<sup>4</sup>,  
4 Ziwei Zeng<sup>1</sup>, Xiaowen He<sup>1</sup>, Fengwei Wang<sup>5</sup>, Xianrui Wu<sup>1, 2, 3</sup> and Ping  
5 Lan<sup>1, 2, 3</sup>

6 **From:** <sup>1</sup>Department of Colorectal Surgery, The Sixth Affiliated Hospital, Sun  
7 Yat-sen University, Guangzhou, Guangdong, China.

8 <sup>2</sup>Guangdong Provincial Key Laboratory of Colorectal and Pelvic Floor  
9 Diseases, The Sixth Affiliated Hospital, Sun Yat-sen University,  
10 Guangzhou, Guangdong, China.

11 <sup>3</sup>Guangzhou Regenerative Medicine and Health Guangdong Laboratory,  
12 Guangzhou, China.

13 <sup>4</sup>Department of Endocrinology, The First Affiliated Hospital of Sun  
14 Yat-sen University, Guangzhou, China.

15 <sup>5</sup>State Key Laboratory of Oncology in South China, Sun Yat-sen  
16 University Cancer Center, Guangzhou, Guangdong, China.

17 **Authorship:** Zhenxing Liang and Huashan Liu contributed equally to this study.

18 **Correspondence authors:**

19 Ping Lan and Xianrui Wu

20 The Sixth Affiliated Hospital, Sun Yat-sen University

21 26 Yuancun Erheng Rd, Guangzhou, Guangdong, China, 510655

22 Tel: 086-020-38255801; Fax: 011-86-20-38254166.

23 Email: lanping@mail.sysu.edu.cn; wuxianr5@mail.sysu.edu.cn

24 Fengwei Wang

25 State Key Laboratory of Oncology in South China,

26 Sun Yat-Sen University Cancer Center,

27 No. 651, Dongfeng Road East, 510060 Guangzhou, China

28 Tel: 86-20-87343193; Fax: 86-20-87343170

29 Email: wangfengw@sysucc.org.cn

30 **Conflict of interest:** The authors have declared that no conflict of interest exists.

31 **Supplemental Figures**

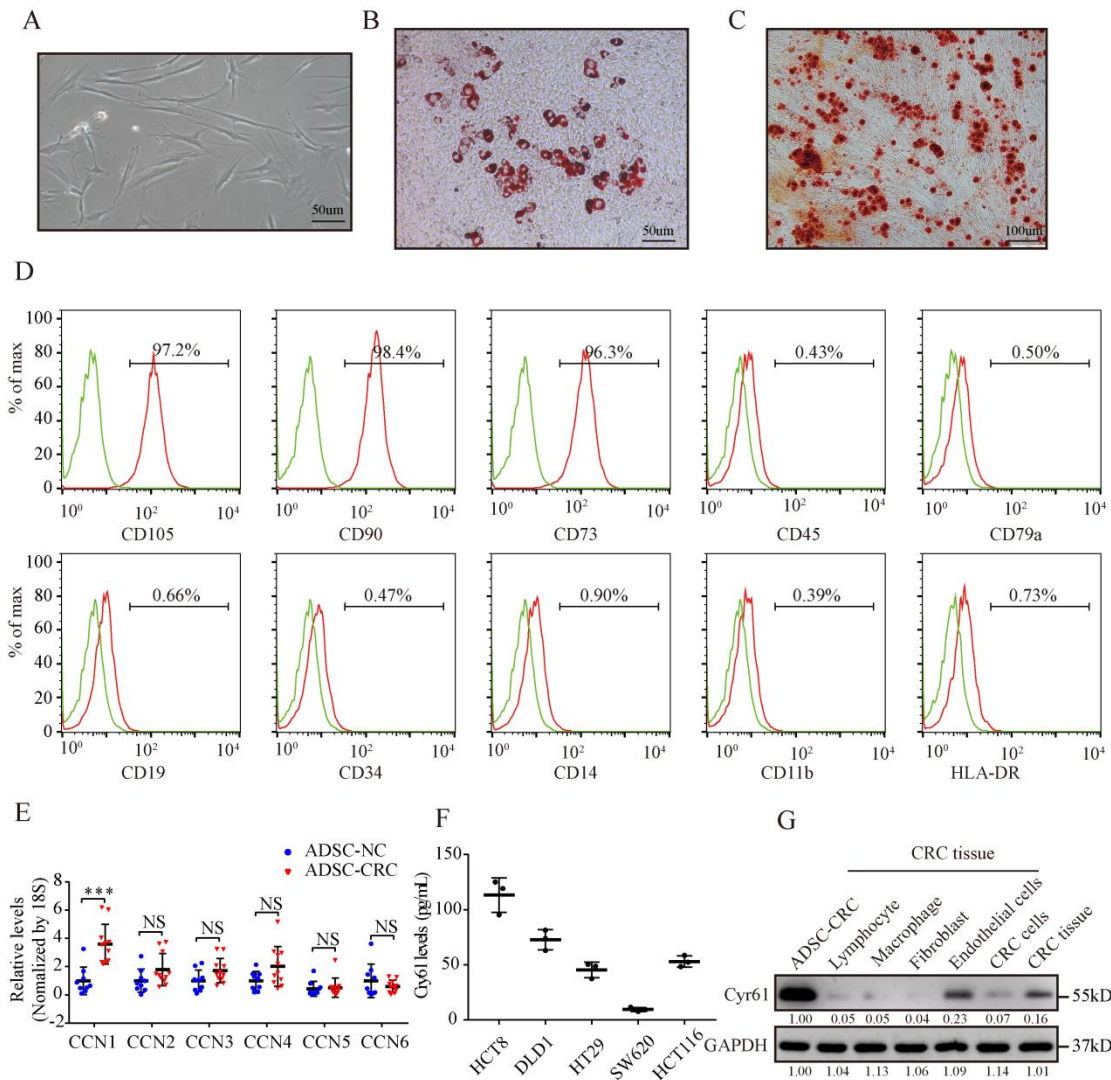

32

33 **Supplementary Figure 1. Characterization of ADSCs**

34 **A** Morphology of ADSCs. Scale bar = 50 µm. **B** ADSCs differentiated toward the  
 35 adipogenic lineages, as evidenced by Oil Red O staining. Scale bar = 50 µm. **C**  
 36 ADSCs differentiated toward the osteogenic lineages, as evidenced by Alizarin Red S  
 37 staining. Scale bar = 100 µm. **D** Flow cytometric analysis of the ADSCs surface  
 38 markers CD105, CD90, CD73, CD45, CD79a, CD19, CD34, CD14, CD11b and  
 39 HLA-DR. IgG isotypes were used as negative controls. **E** qRT-PCR analysis of CCN  
 40 protein family mRNA levels in ADSCs-NC (n=9) and ADSCs-CRC (n=11). **F** ELISA  
 41 analysis of medium Cy61 levels in CRC cell lines. **G** Western blot analysis of Cy61  
 42 protein levels in ADSC-CRC, CRC tissues, and lymphocyte, macrophage, fibroblast  
 43 endothelial cells and CRC cells isolated from CRC tissue. Values are represented as

44 mean  $\pm$ SD. NS, no significant, \*\*\* $p < 0.001$ , by 2-tailed Student's t test (**E**).

45

46

47

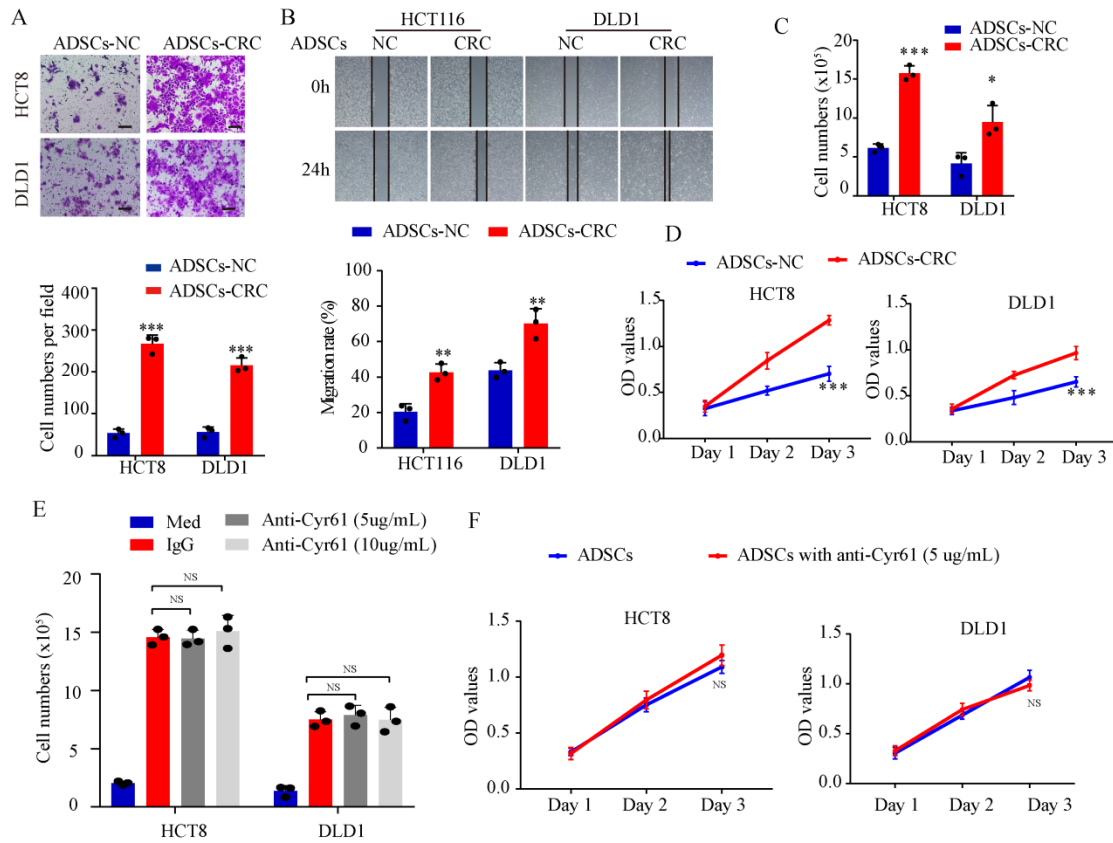

48

49 **Supplementary Figure 2. ADSCs derived Cyr61 have no effect on CRC cell**  
 50 **proliferation *in vitro***

51 **A** Representative images of transwell migration assays for HCT8 and DLD1 cells  
 52 co-cultured with ADSCs-NC or ADSCs-CRC. Scale bar = 100  $\mu$ m. **B** Representative  
 53 images of wound-healing assays for HCT116 and DLD1 cells co-cultured with  
 54 ADSCs-NC or ADSCs-CRC. **C** and **D** Cell counting and MTS assays for HCT8 and  
 55 DLD1 cells co-cultured with ADSCs-NC or ADSCs-CRC. **E** and **F** Cell counting and  
 56 MTS assays for HCT8 and DLD1 cells co-cultured with culture medium alone (Med)  
 57 or ADSCs in the presence or absence of an anti-Cyr61 antibody at 5 or 10 $\mu$ g/mL, or  
 58 an isotype-matched IgG control (IgG). Values are represented as mean  $\pm$ SD. NS, no  
 59 significant, \* $p < 0.05$ , \*\* $p < 0.01$ , \*\*\* $p < 0.001$ , by 2-tailed Student's t test (**A**, **B**, **C**,  
 60 **D** and **F**) and one-way ANOVA (**E**).

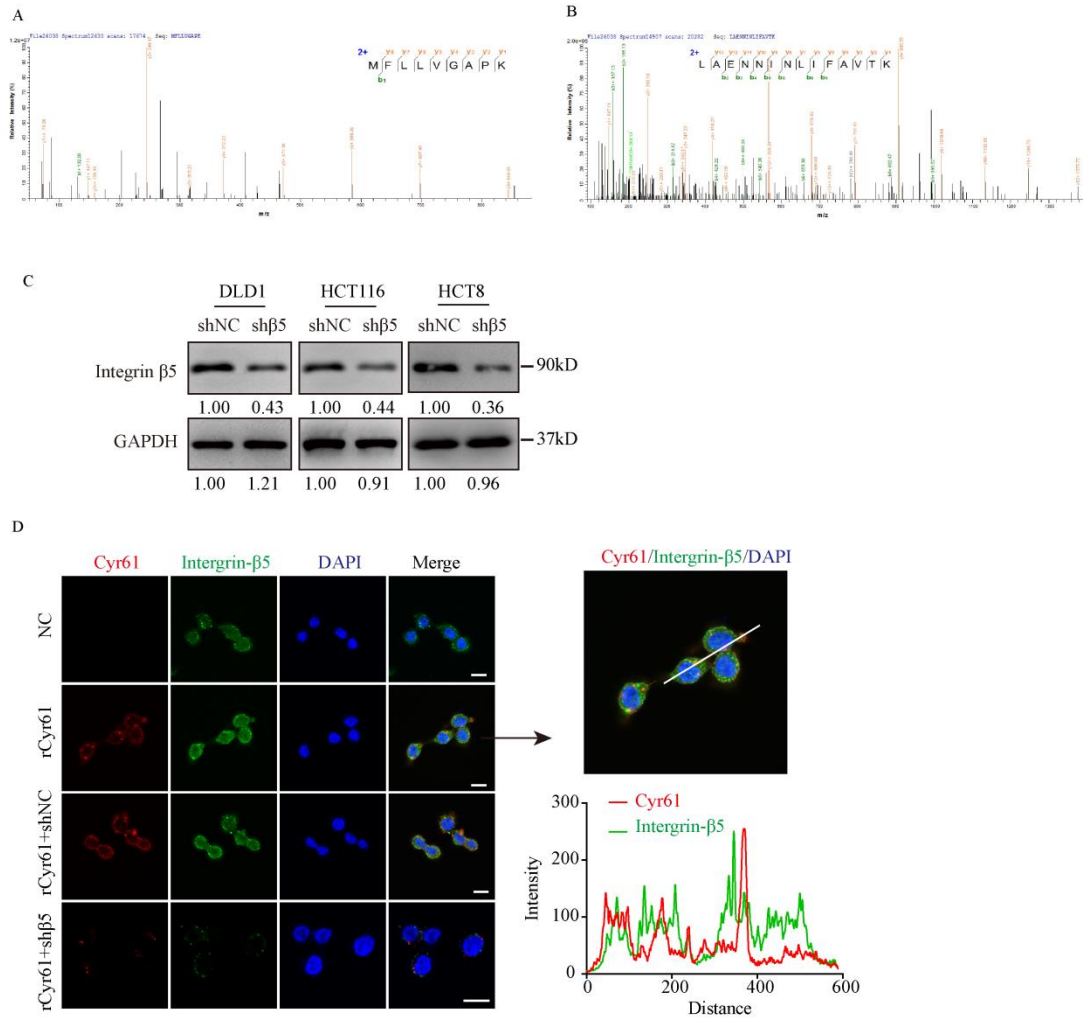

61

62 **Supplementary Figure 3. Cyr61 receptor identification on CRC cells**

63 **A** Mass spectra of a representative peptide fragment of integrin  $\alpha_v$  from the bands. **B**

64 Mass spectra of a representative peptide fragment of integrin  $\beta_5$  from the bands. **C**

65 Western blot analysis of the efficiency of shRNA for integrin  $\beta_5$  in DLD1, HCT116

66 and HCT8 cells. **D** Confocal microscopy to confirm the colocalization between Cyr61

67 and integrin  $\alpha_v\beta_5$  on HCT8 cells. Scale bar = 10  $\mu$ m.

68

69

70

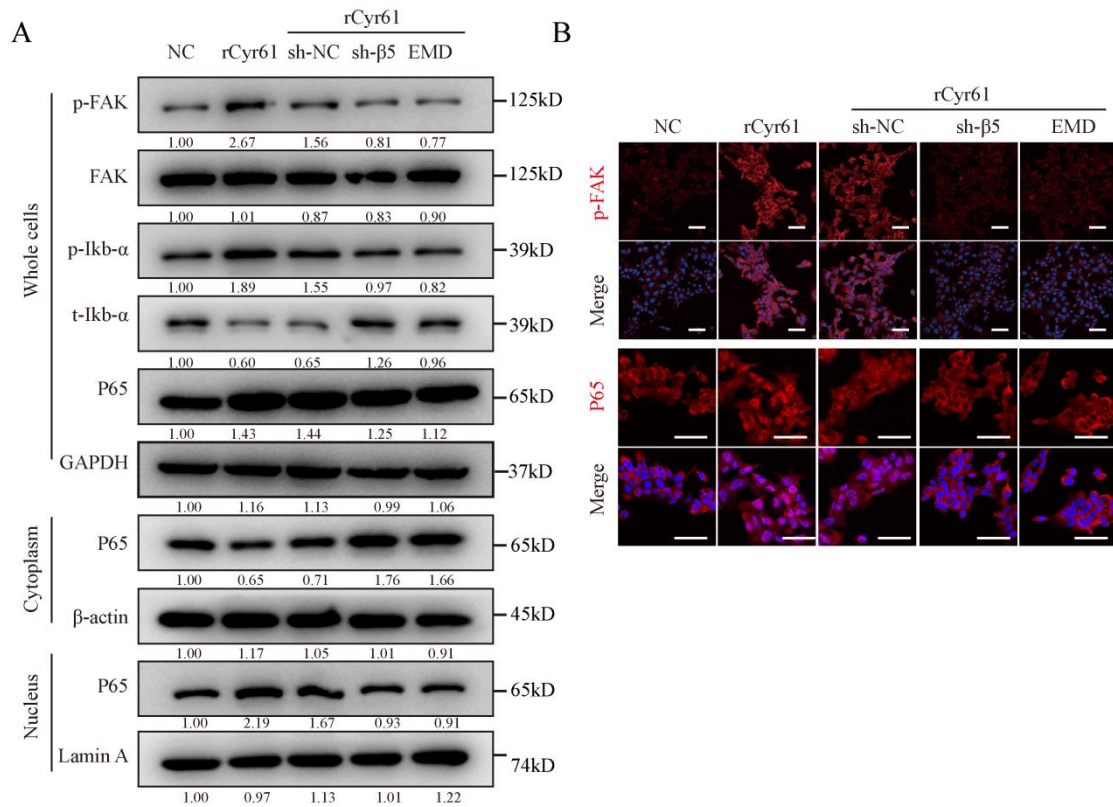

71

72 **Supplementary Figure 4. The  $\alpha_v\beta_5$ /FAK/NF- $\kappa$ B signaling pathway changes in**  
 73 **DLD1 cells**

74 **A** Western blot analysis the expression of p-FAK, FAK, p-Ikb- $\alpha$ , t-Ikb- $\alpha$ P65 and P65  
 75 in DLD1 cells with integrin $\beta_5$  knockdown or with integrin  $\alpha_v\beta_5$  inhibitor EMD.  
 76 GAPDH,  $\beta$ -actin and Lamin A were used as the controls. **B** Confocal microscopy of  
 77 DLD1 cells with integrin $\beta_5$  knockdown or treated with integrin  $\alpha_v\beta_5$  inhibitor EMD  
 78 for the expression of p-FAK and subcellular localization of P65. Scale bar = 50  $\mu$ m.

79

80

81

82

83

84

85

86

87

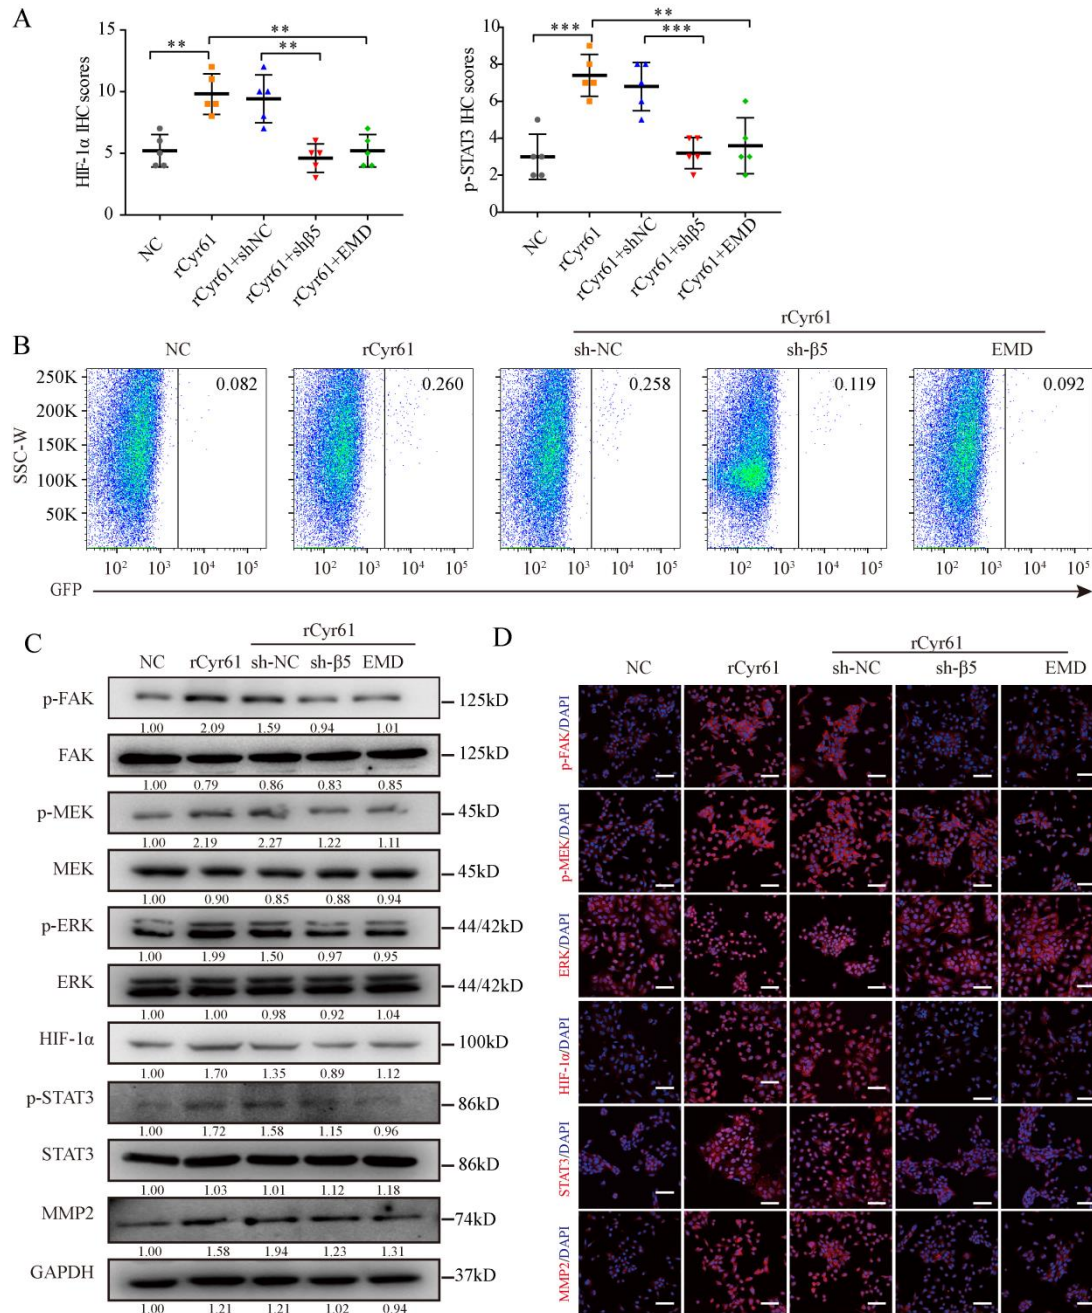

88

89 **Supplementary Figure 5. The  $\alpha_v\beta_5$ /FAK/HIF-1 $\alpha$ /STAT3/MMP2 signaling cascade**  
 90 **changes after Cyr61 treatment**

91 **A** IHC scoring analyses of p-STAT3 and HIF-1 $\alpha$  expression in the subcutaneous  
 92 tumors. **B** Flow cytometric analysis of the GFP labeled CTCs from the nude mice  
 93 whole-blood. **C** Western blot analysis of  $\alpha_v\beta_5$ /FAK/HIF-1 $\alpha$ /STAT3/MMP2 signaling  
 94 cascade in DLD1 cells pretreated with rCyr61, EMD or knockdown integrin $\beta_5$   
 95 expression. **D** Confocal microscopy analysis of  $\alpha_v\beta_5$ /FAK/HIF-1 $\alpha$ /STAT3/MMP2  
 96 signaling cascade in HCT8 cells pretreated with rCyr61, EMD or knockdown

97 integrin $\beta_5$  expression. Scale bar = 50  $\mu$ m.

98

99

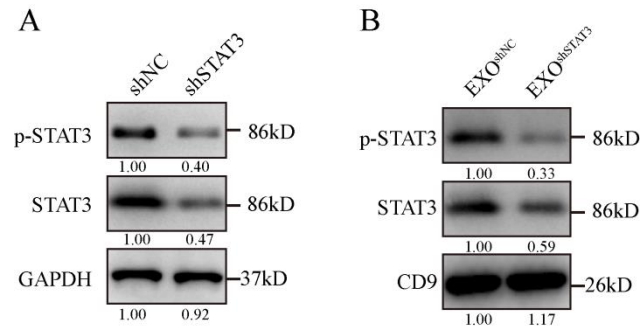

100

101 **Supplementary Figure 6. A** Western blot analysis of the efficiency of shRNA for

102 STAT3 in HCT8 cells. **B** Western blot analysis of p-STAT3 and STAT3 levels in

103 exosomes.

104

105

106

107

108

109

110

111

112

113

114

115

116

117

118

119

120

121

122 **Supplemental Tables**

123 **Table S1 Correlation between Cyr61 levels and clinicopathologic characteristics**  
 124 **of CRC patients**

125

| Characteristics | Frequency | Cyr61 expression level |      |                              |
|-----------------|-----------|------------------------|------|------------------------------|
|                 |           | Low                    | High | <i>p</i> -value <sup>a</sup> |
| Gender          |           |                        |      | 0.984                        |
| Female          | 118       | 10                     | 108  |                              |
| Male            | 246       | 21                     | 225  |                              |
| Age             |           |                        |      | 0.237                        |
| ≤ 59            | 166       | 11                     | 155  |                              |
| > 59            | 198       | 20                     | 178  |                              |
| T stage         |           |                        |      | < 0.001                      |
| T1/T2           | 96        | 26                     | 70   |                              |
| T3/T4           | 268       | 5                      | 263  |                              |
| N stage         |           |                        |      | < 0.001                      |
| N0              | 192       | 28                     | 164  |                              |
| N1/N2           | 172       | 3                      | 169  |                              |
| M stage         |           |                        |      | 0.034                        |
| M0              | 271       | 28                     | 243  |                              |
| M1              | 93        | 3                      | 90   |                              |
| TNM Stage       |           |                        |      | < 0.001                      |
| I+II            | 179       | 28                     | 151  |                              |
| II+IV           | 185       | 3                      | 182  |                              |

126

<sup>a</sup> Chi-square test

127

128

129

130

131

132 **Table S2 The ROC curve assay of CEA, CA199, CA125 and Cyr61**

133

| Variables | ACU   | <i>p</i> -value <sup>a</sup> | 95 % Confidence interval |             |
|-----------|-------|------------------------------|--------------------------|-------------|
|           |       |                              | Lower bound              | Upper bound |
| CEA       | 0.667 | < 0.001                      | 0.611                    | 0.723       |
| CA199     | 0.522 | 0.516                        | 0.460                    | 0.584       |
| CA125     | 0.600 | 0.003                        | 0.540                    | 0.661       |
| Cyr61     | 0.933 | < 0.001                      | 0.906                    | 0.960       |

134

<sup>a</sup>Null hypothesis: true area = 0.5

135

136

137

138

139



140 **Table S3 List of surface membrane proteins of mass spectrometry results**  
 141 **(score>35)**  
 142

| Num | Prot_acc | Prot_desc                             | Prot_score | Prot_mass<br>(KD) | Coverage | Unique<br>peptides | PSM |
|-----|----------|---------------------------------------|------------|-------------------|----------|--------------------|-----|
| 1   | P06756   | Integrin alpha-V                      | 3401       | 117.048           | 39.1     | 41                 | 162 |
| 2   | P18084   | Integrin beta-5                       | 1811       | 91.303            | 36.5     | 26                 | 82  |
| 3   | Q02413   | Desmoglein-1                          | 98         | 114.702           | 3.7      | 3                  | 3   |
| 4   | Q9Y5I4   | Protocadherin<br>alpha-C2             | 57         | 110.010           | 4.7      | 6                  | 12  |
| 5   | O00522   | Krev interaction<br>trapped protein 1 | 49         | 84.979            | 2.9      | 2                  | 8   |
| 6   | Q9Y5X5   | Neuropeptide FF<br>receptor 2         | 46         | 60.858            | 4.4      | 4                  | 7   |
| 7   | Q8NGB9   | Olfactory receptor<br>4F6             | 38         | 35.787            | 2.6      | 1                  | 2   |
| 8   | Q12934   | Filensin                              | 36         | 74.784            | 2.3      | 2                  | 4   |
| 9   | O95196   | Chondroitin sulfate<br>proteoglycan 5 | 36         | 60.720            | 2.3      | 1                  | 5   |

143  
 144  
 145  
 146  
 147  
 148  
 149  
 150  
 151  
 152  
 153  
 154  
 155  
 156  
 157  
 158  
 159  
 160  
 161  
 162  
 163

164 **Table S4 Oligonucleotide sequences**

165

| Name         | Sequences(5' - 3')                                                                                                                                     |
|--------------|--------------------------------------------------------------------------------------------------------------------------------------------------------|
| 18S          | F: CGGCTACCACATCCAAGGAA<br>R: GCTGGAATTACCGCGGCT                                                                                                       |
| Cyr61        | F: CGCCTTGTGAAAGAAACCCG<br>R: GGTTTCGGGGGATTTCTTGGT                                                                                                    |
| CCN2         | F: GTTTGGCCCAGACCCAACTA<br>R: GGCTCTGCTTCTCTAGCCTG                                                                                                     |
| CCN3         | F: TGATGGTCATTGGGACCTGC<br>R: GGTGCTCTGTAGGTGTGCTT                                                                                                     |
| CCN4         | F: GCGTGGAATGTGTTTGCTCA<br>R: GCCTGTACAAGAAAAGCCACC                                                                                                    |
| CCN5         | F: CTGTGCCTCTGTAAGCAGGA<br>R: AGAAGCGGTTCTGGTTGGAC                                                                                                     |
| CCN6         | F: CTCACTGCGAAGGCAGGTTA<br>R: GTACCCTGCAGCAGA ACTGT                                                                                                    |
| sh $\beta$ 5 | F:CCGGAAAGATGATGTGCCCCACATCGCATTGCTCGAGCAATG<br>CGATGTGGGGCACACATCTTTTTTG<br>R:AATTCAAAAAAAGATGATGTGCCCCACATCGCATTG<br>CTCGAGCAATGCGATGTGGGGCACATCATCT |
| shSTAT3      | F:CCGGGGCCATCTTGAGCACTAAGCCCTCGAGGGCTTAGTGCT<br>CAAGATGGCC TTTTTG<br>R:AATTCAAAAAGGCCATCTTGAGCACTAAGCCCTCGAGGGCTT<br>AGTGCTCAAGATGGCC                  |

166
